# Supplementary material for: G4Atlas: a comprehensive transcriptome-wide G-quadruplex database
Source: PubMed Central journal article supplement (PMC9825586; doi:10.1093/nar/gkac896), 2022-10-16
Supplement: gkac896_supplemental_file.pdf [file gkac896_supplemental_file.pdf]

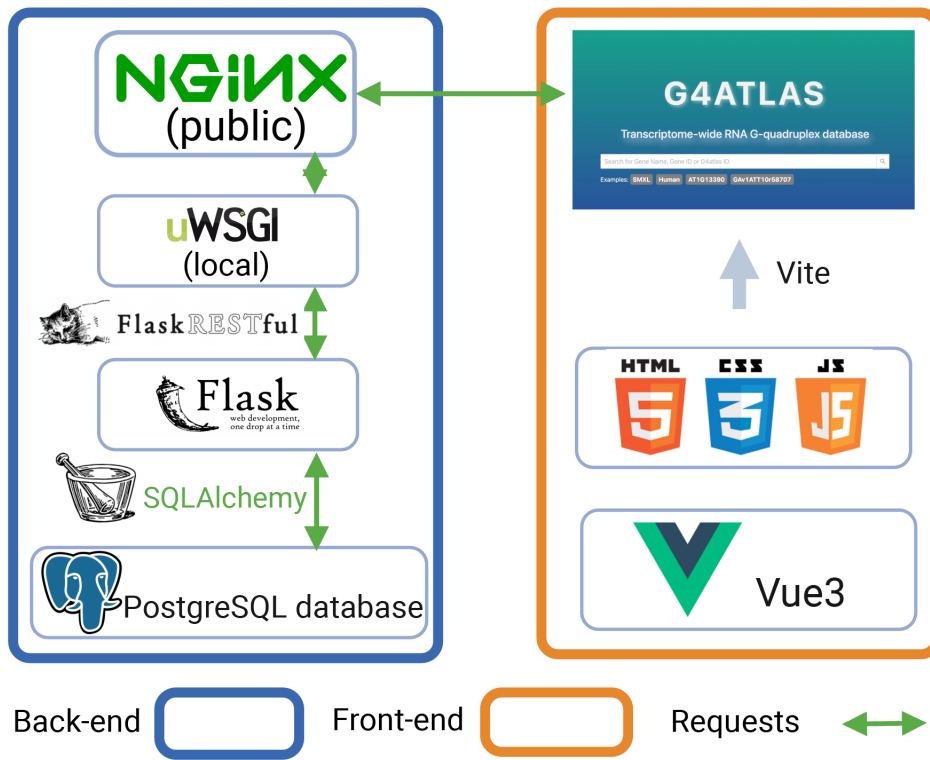

Figure S1. Front-end and back-end of the database.
